# Supplementary material
Source: PubMed Central journal article supplement (PMC2672608)

## A. Western on in vitro translated proteins

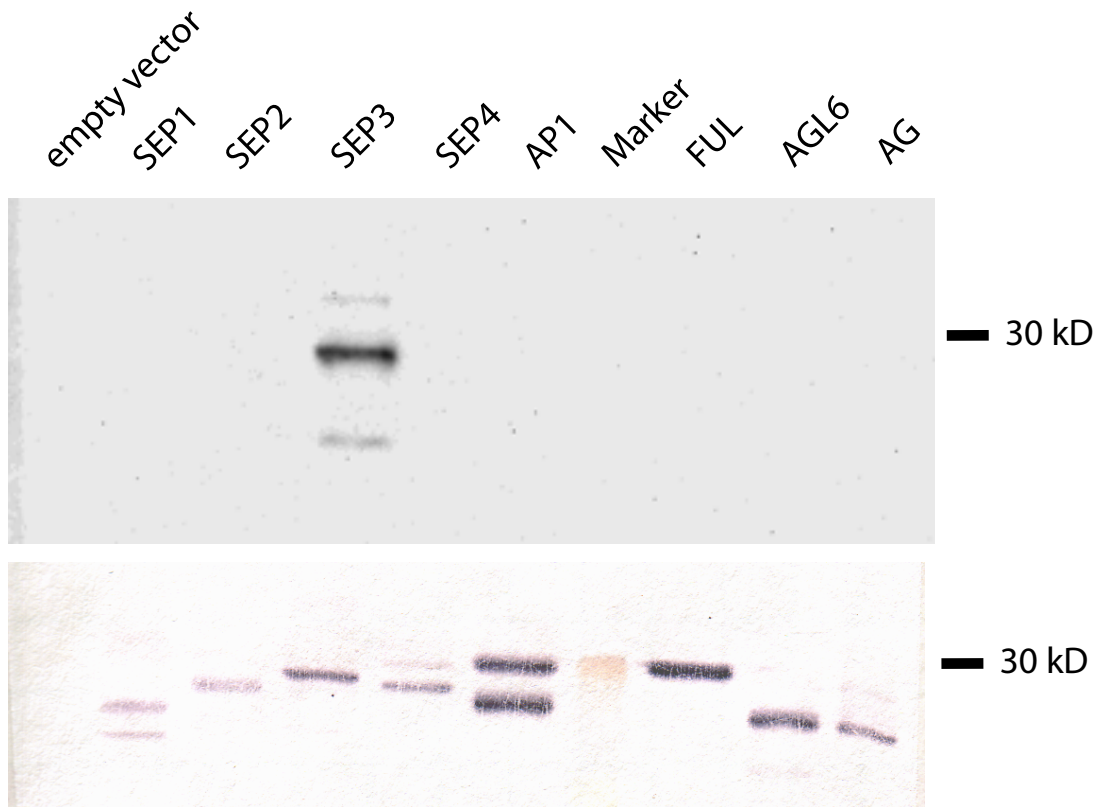

## B. Westerns on plant extracts

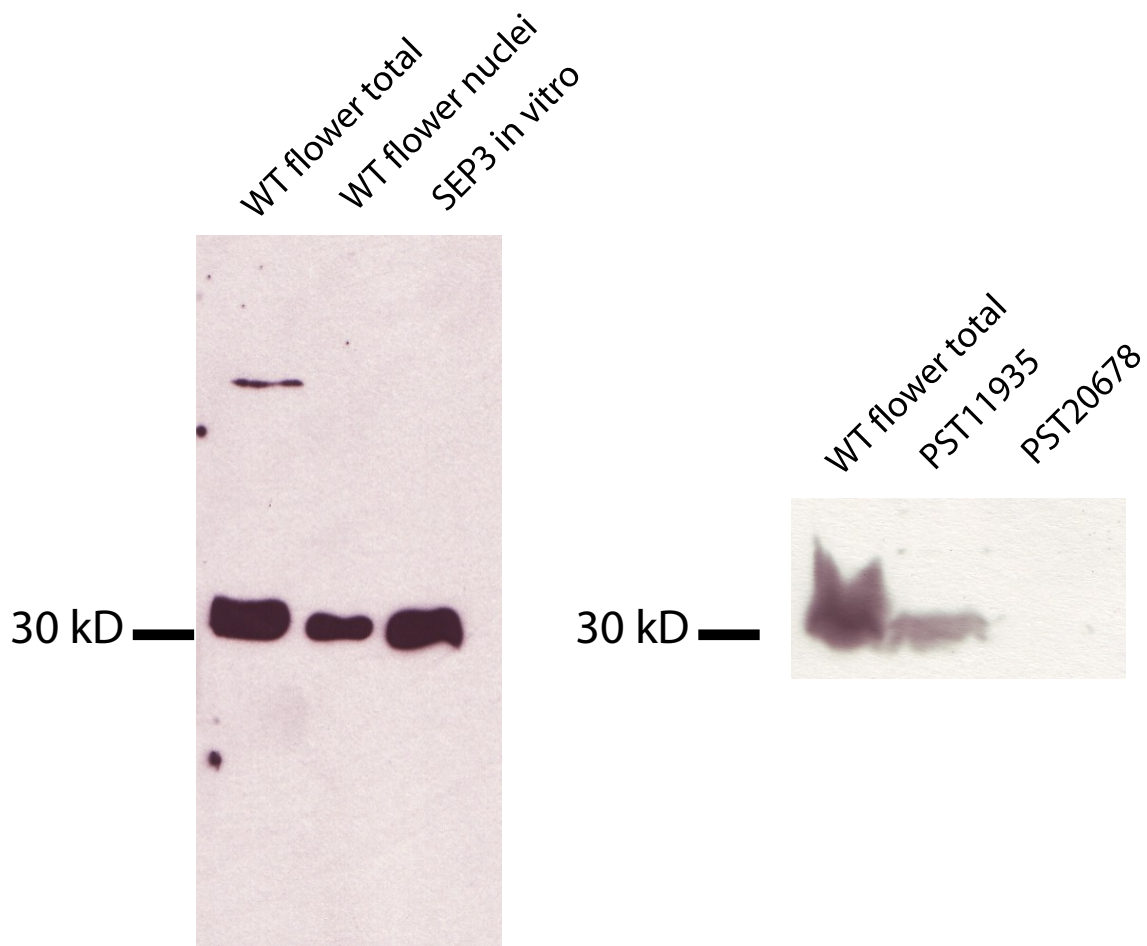

Supplement: pbio.1000090.sg001.pdf [file pbio.1000090.sg001.pdf]

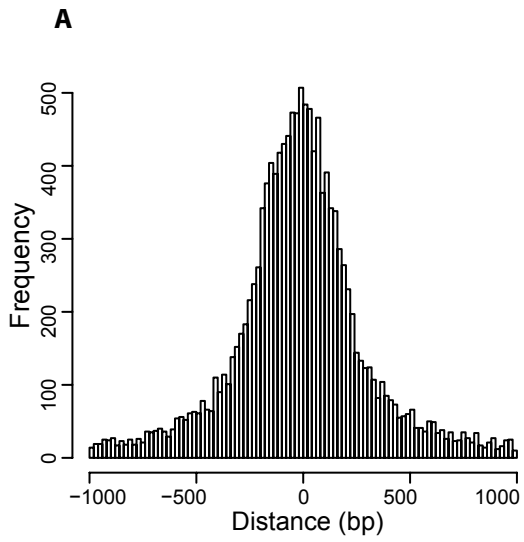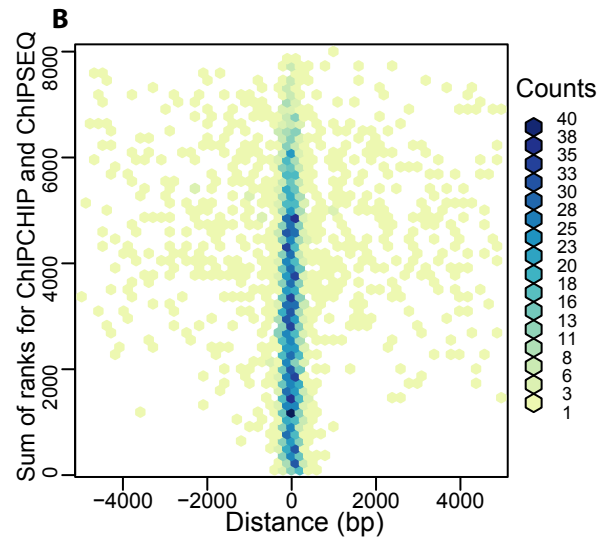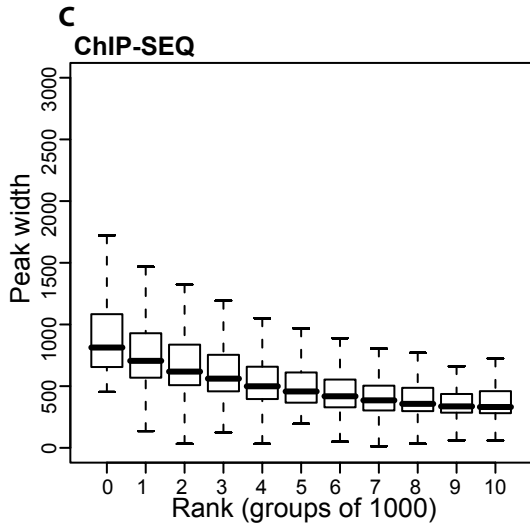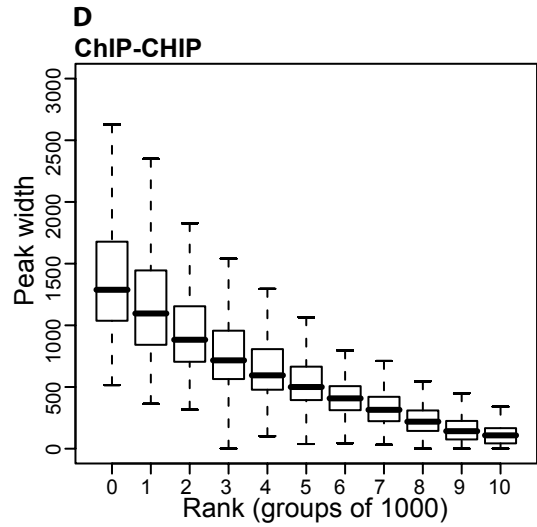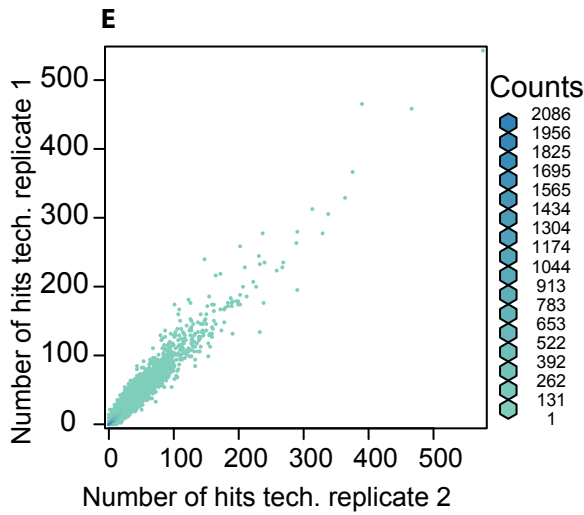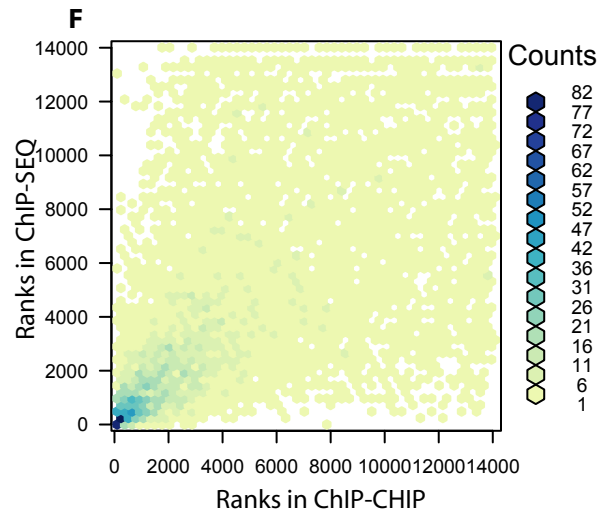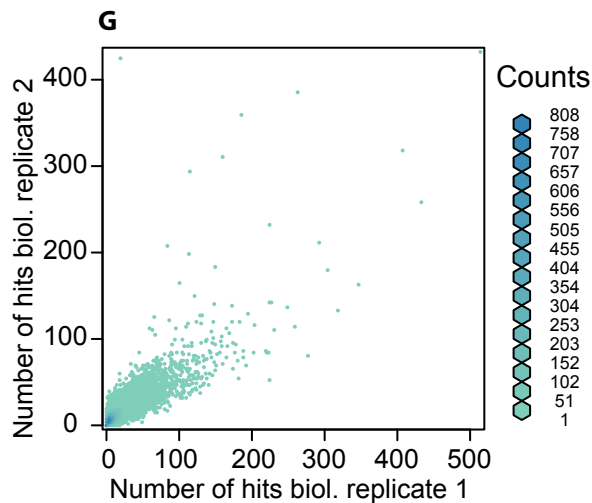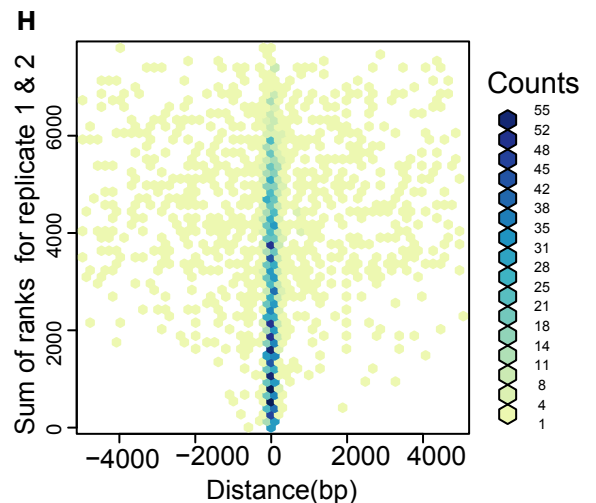

Supplement: pbio.1000090.sg002.pdf [file pbio.1000090.sg002.pdf]

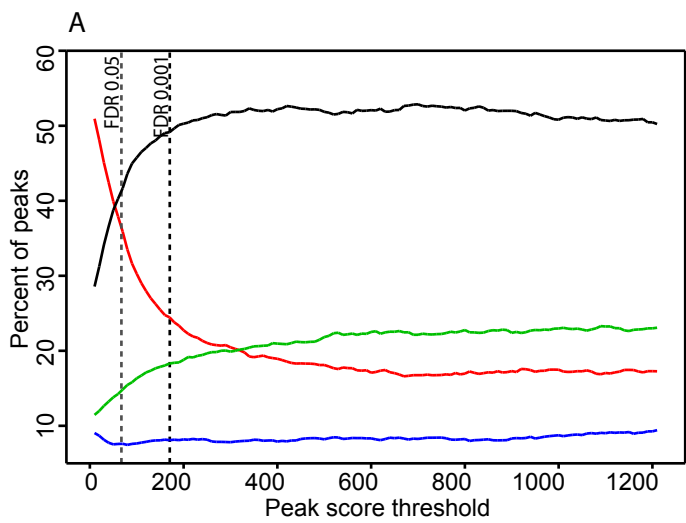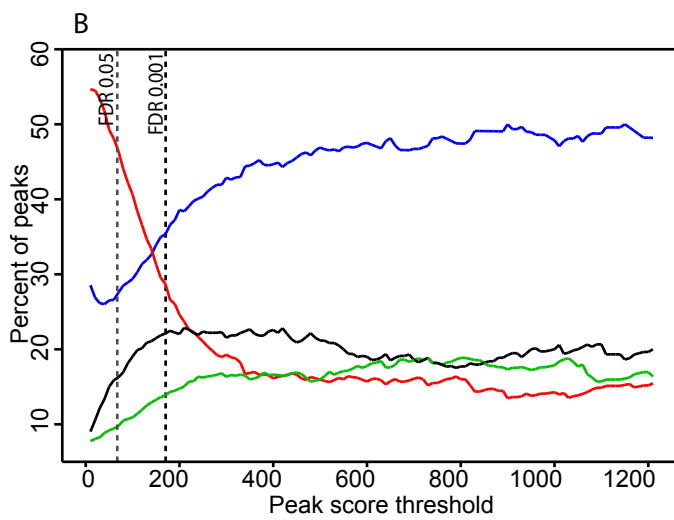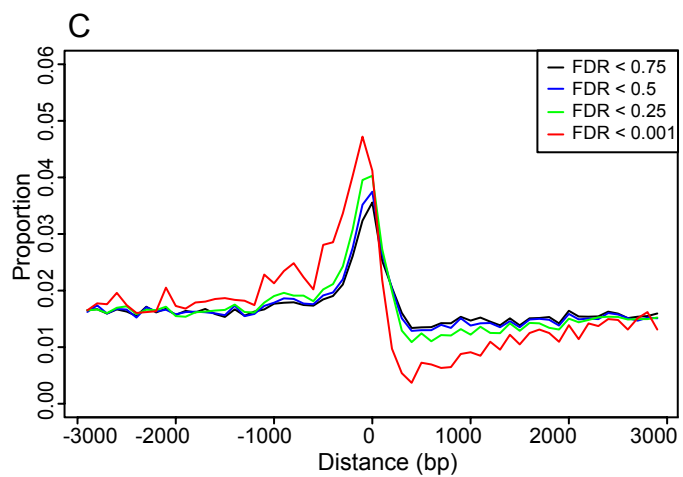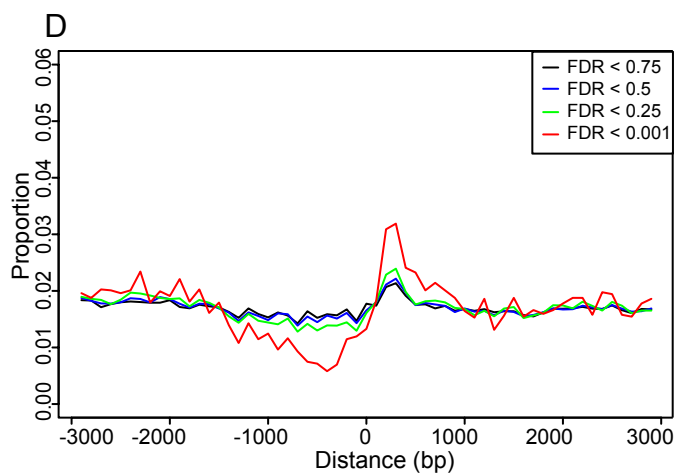

Supplement: pbio.1000090.sg003.pdf [file pbio.1000090.sg003.pdf]

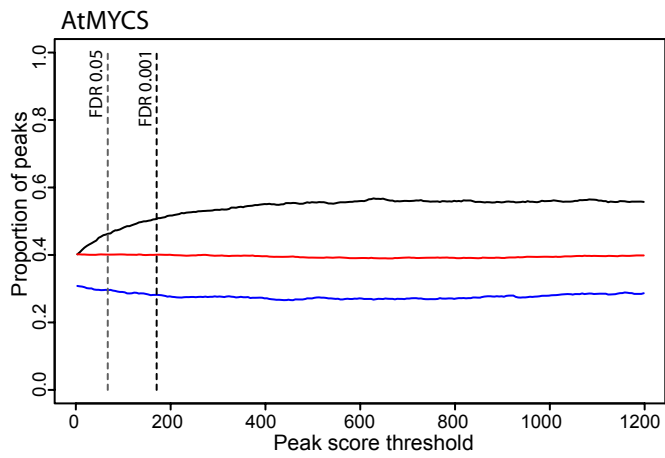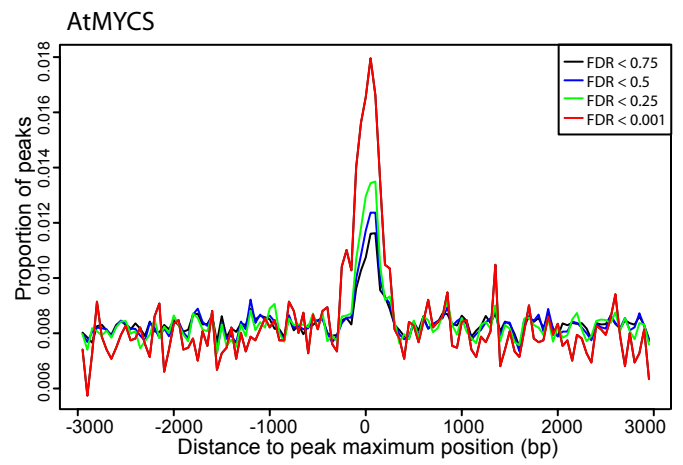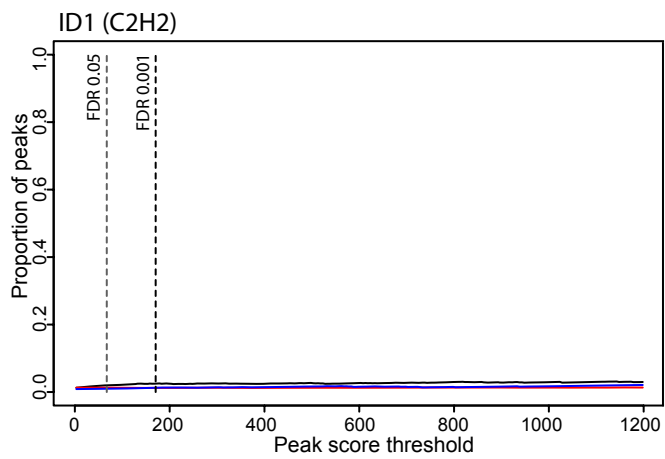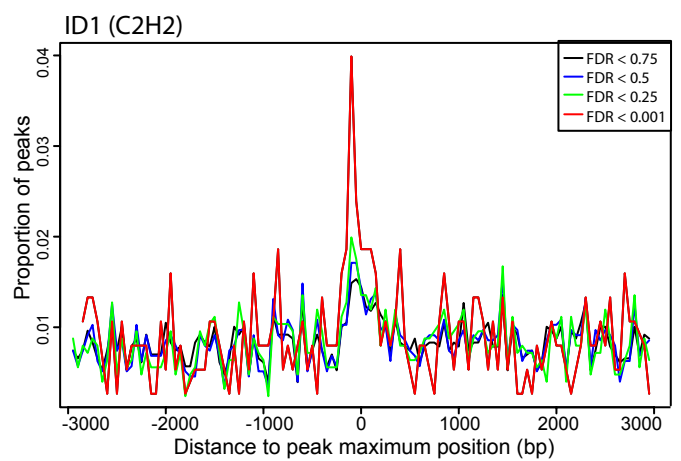

Supplement: pbio.1000090.sg004.pdf [file pbio.1000090.sg004.pdf]

## A. Global gene expression analysis

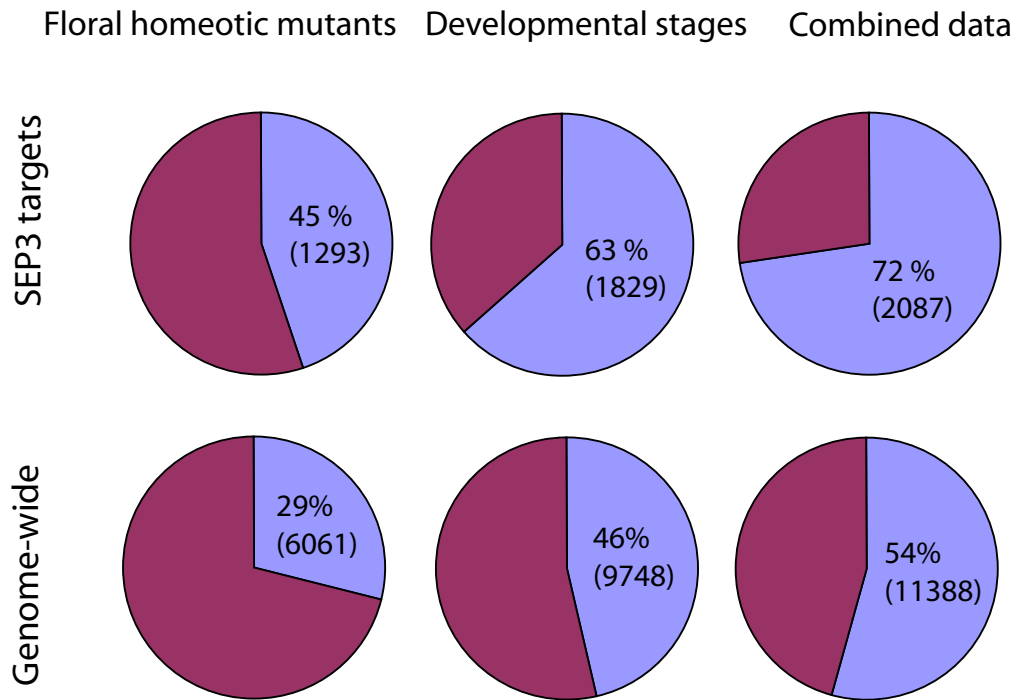

## B. Genes correlated with correlated expression to SEP3

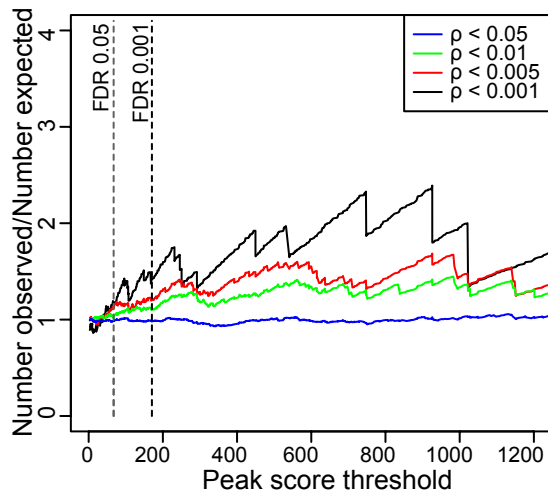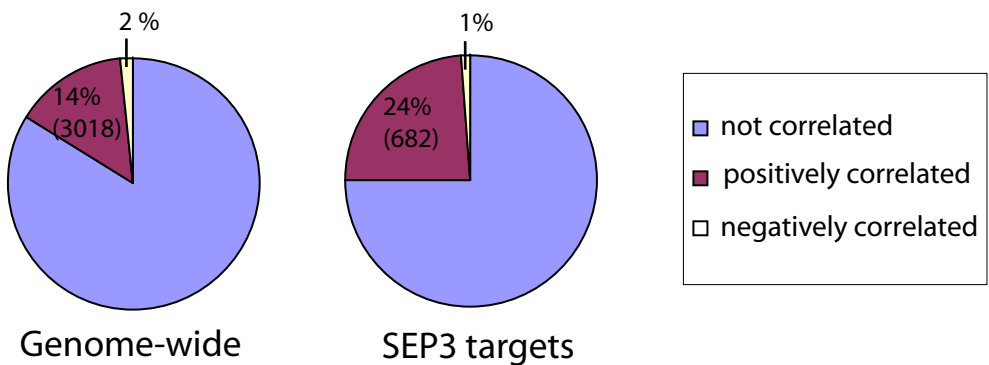

Supplement: pbio.1000090.sg005.pdf [file pbio.1000090.sg005.pdf]

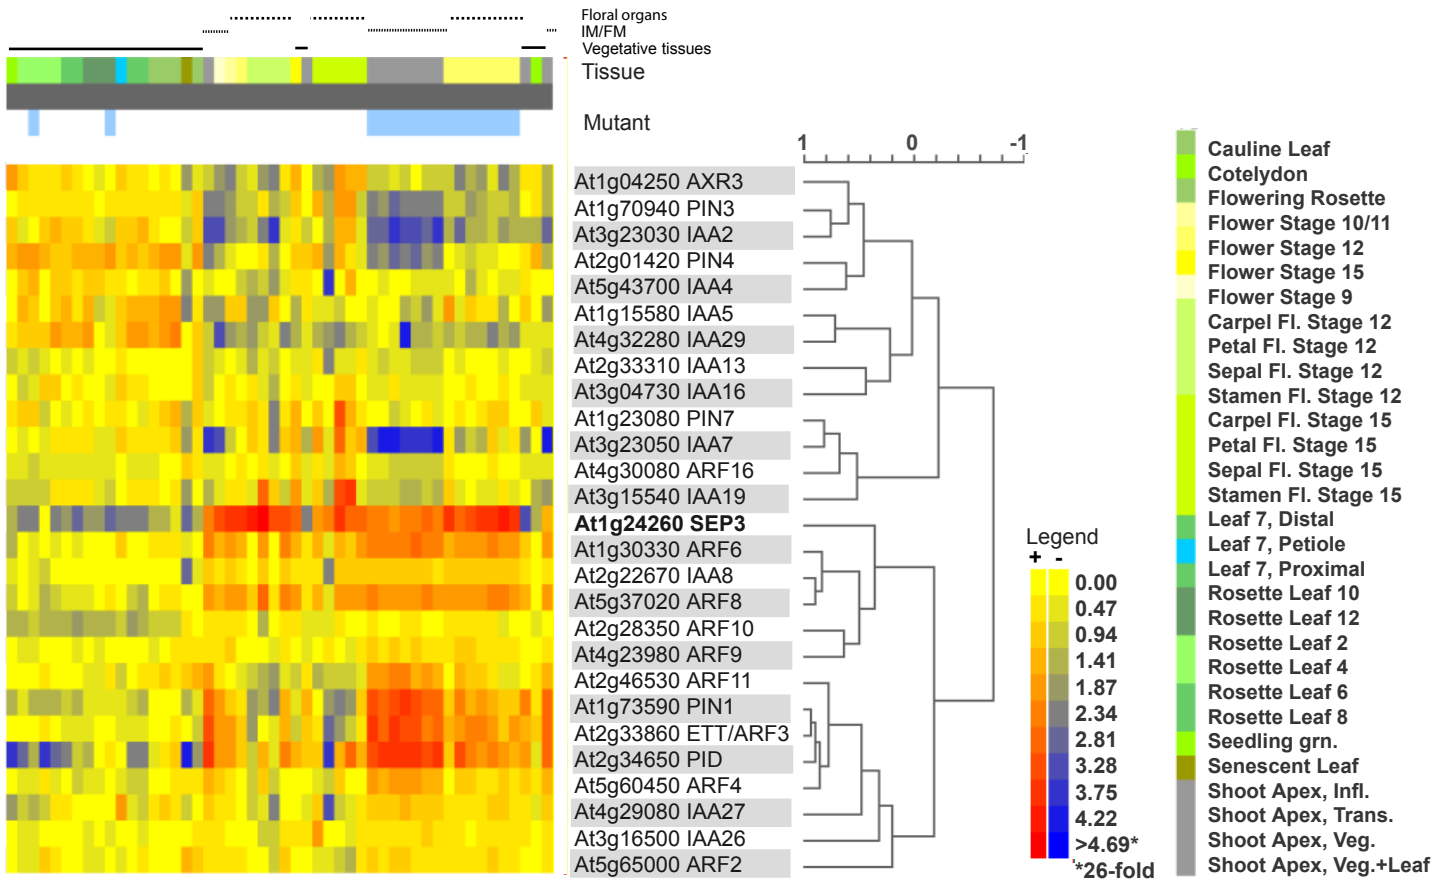

Supplement: pbio.1000090.sg006.pdf [file pbio.1000090.sg006.pdf]
